# Supplementary material
Source: Research Square preprint supplement (doi:10.21203/rs.3.rs-9718019/v1)
Supplement: Supplementary file 1 [file 2a7b77666b2774a89e7ae08a.docx]

**Table 4.** Interaction of potential drugs with TPX2, TTK, CKS2, and MYC receptors.

| **Hub protein** | **Drugs** | **Affinity**  **(kcal/mol)** | **Two-dimensional depiction of interactions** | **Three-dimensional depiction of interactions** |
| --- | --- | --- | --- | --- |
| TPX2 | Dacomitinib | -8.3 | 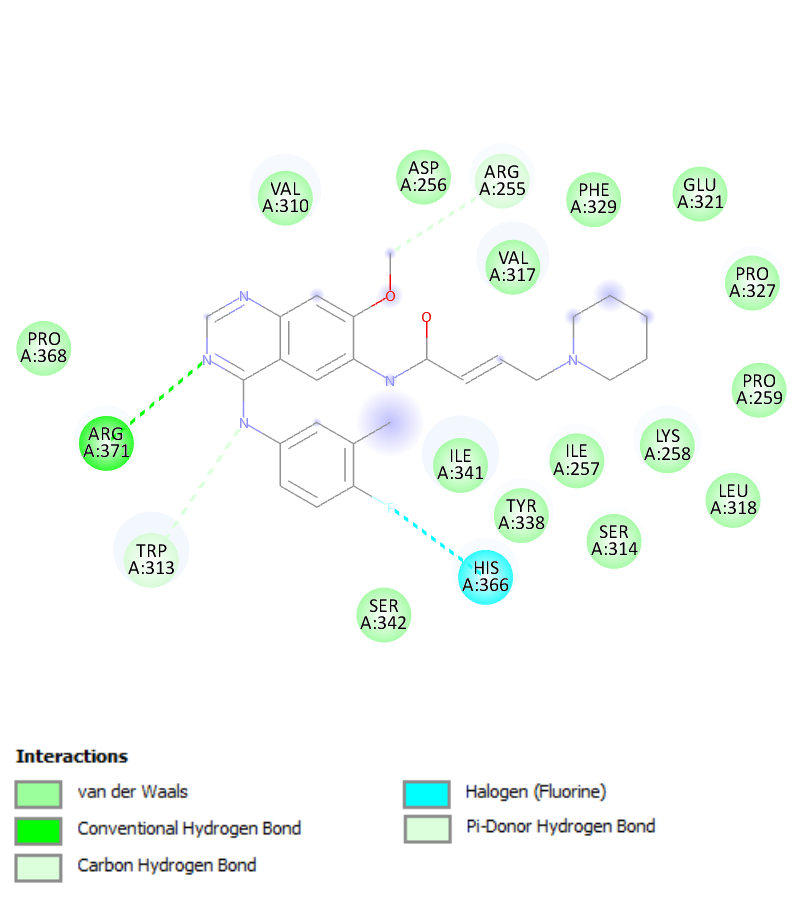 | 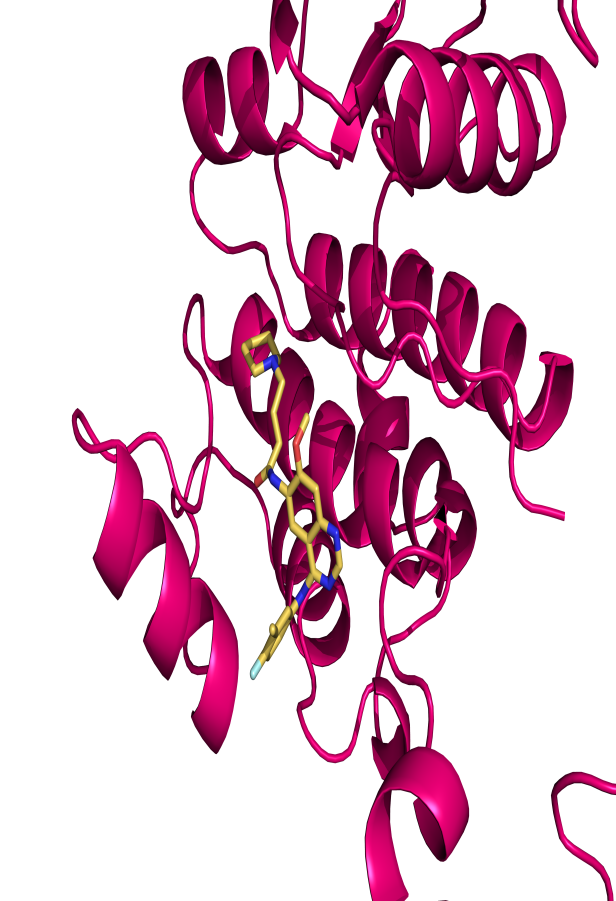 |
| TTK | Fostamatinib | -9.5 | 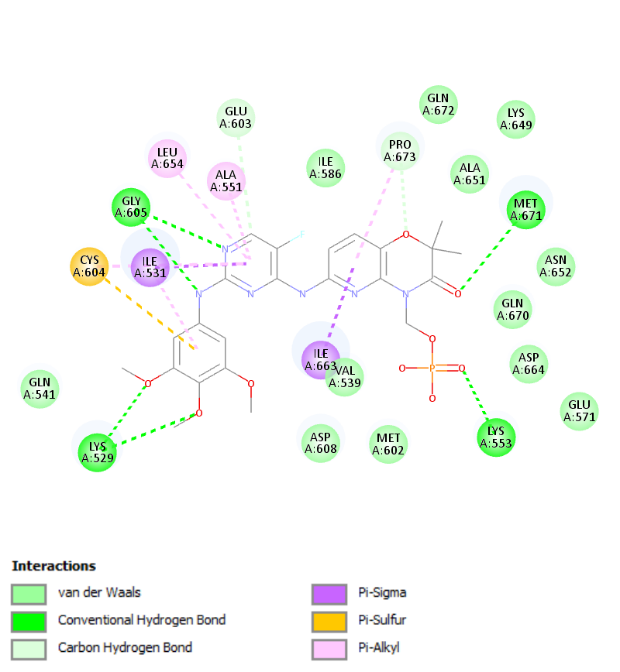 | 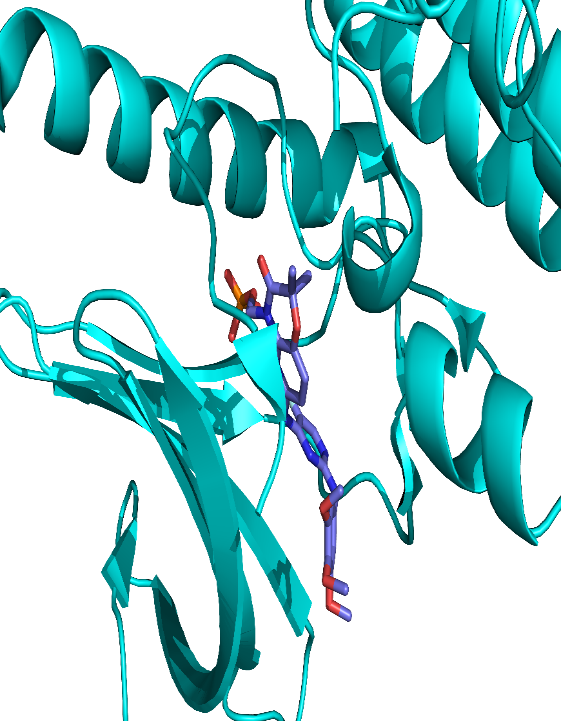 |
| TTK | Pyrazolanthrone | -8.8 | 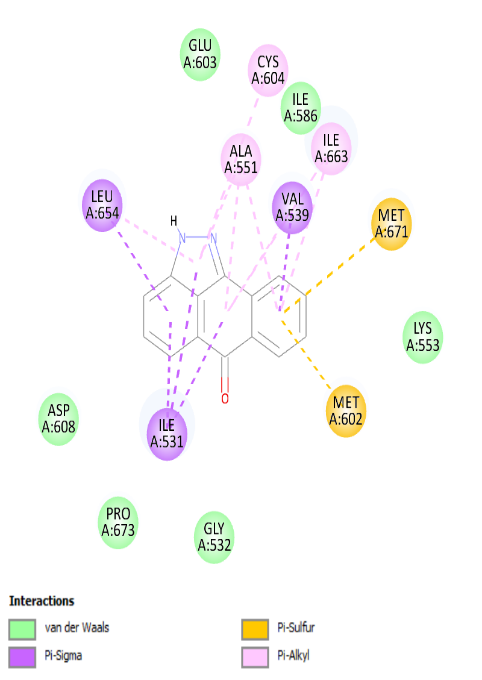 | 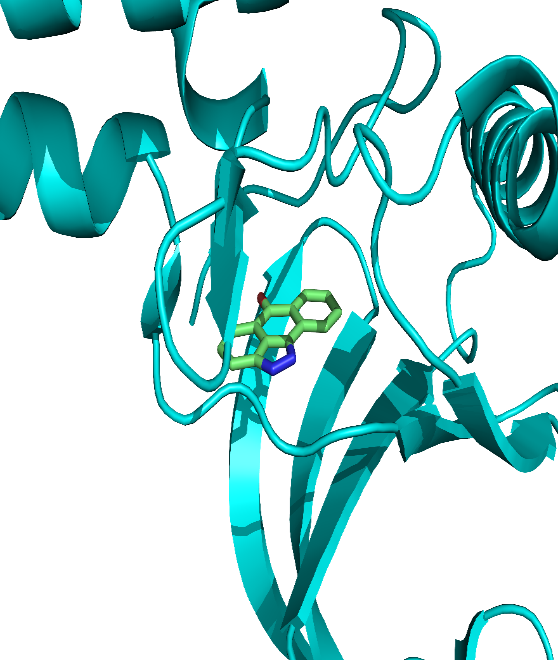 |
| TTK | BOS172722 | -9.0 | 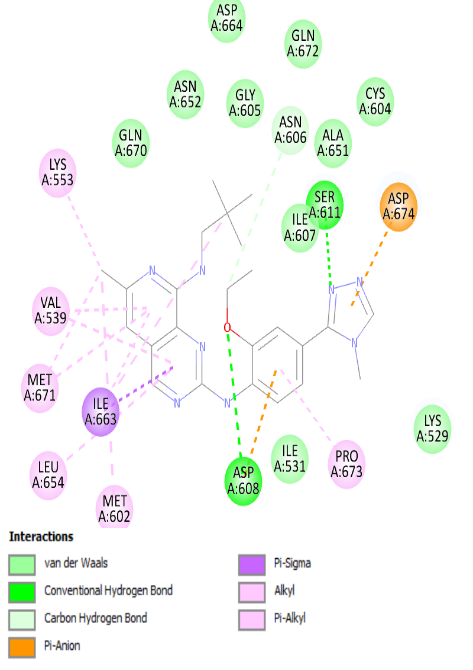 | 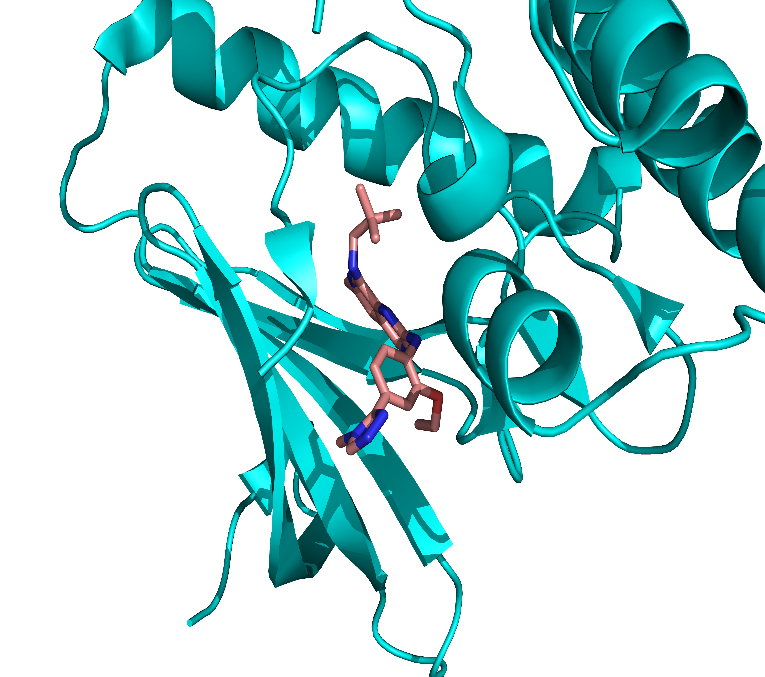 |
| TTK | BAY-1161909 (Bay-11) | -10.0 | 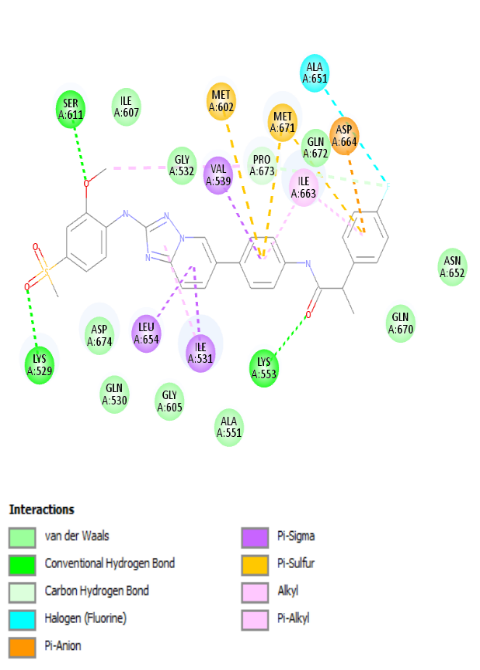 | 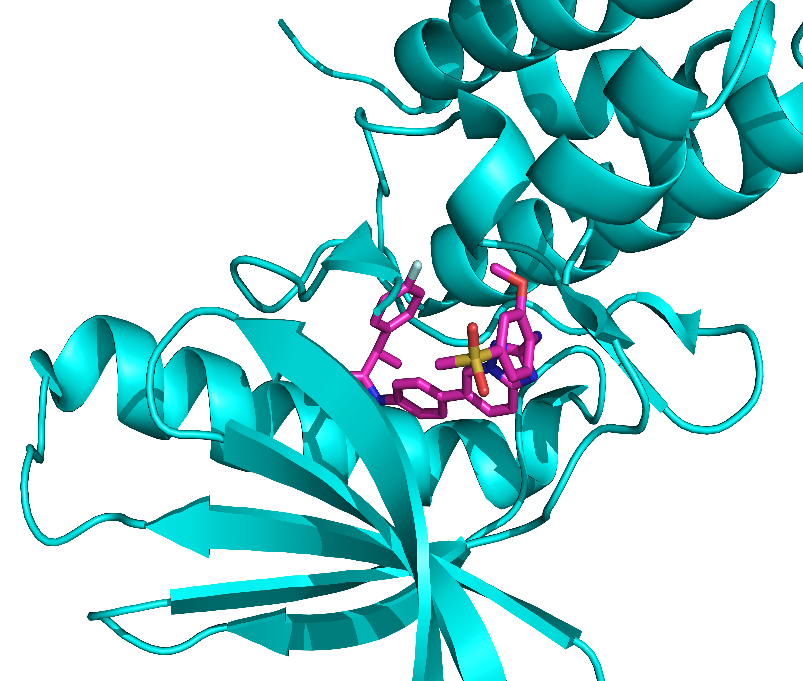 |
| TTK | BAY-1217389 (Bay-12) | -11.0 | 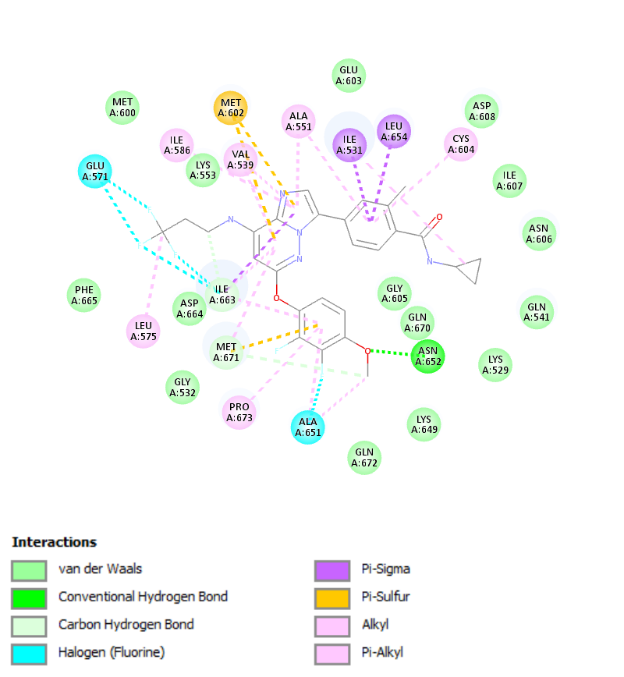 | 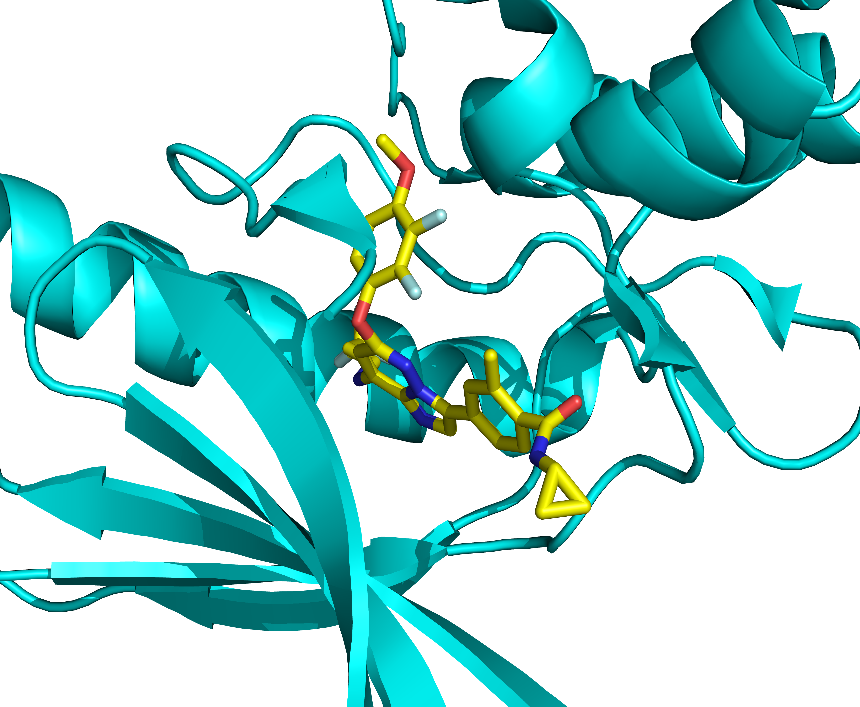 |
| TTK | Hesperadin (HES) | -9.8 | 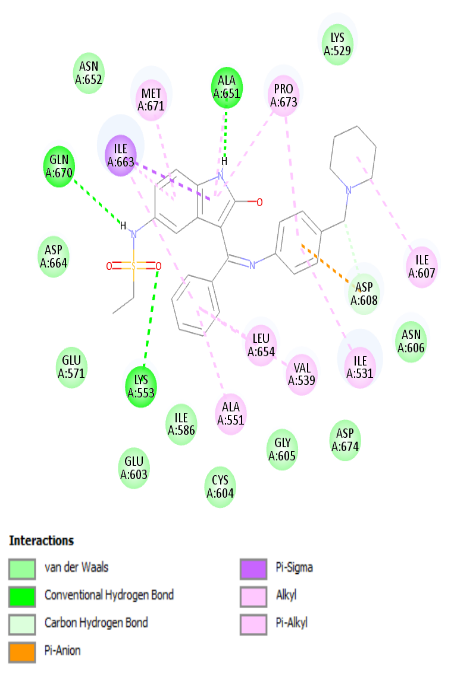 | 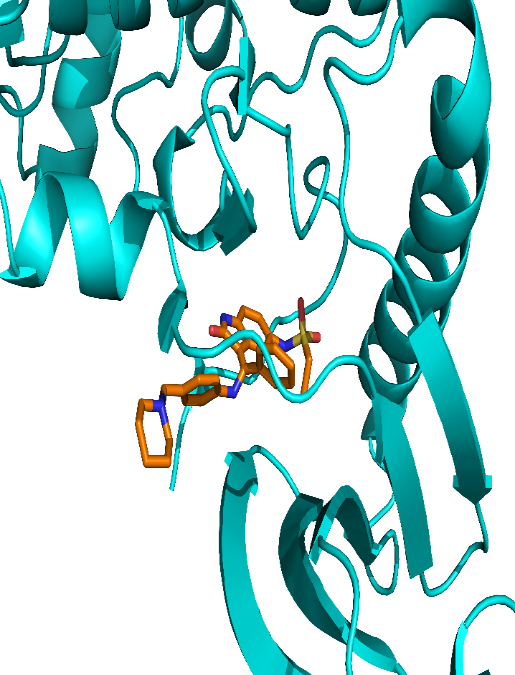 |
| CKS2 | (Silmitasertib) CX-4945 | -10.5 | 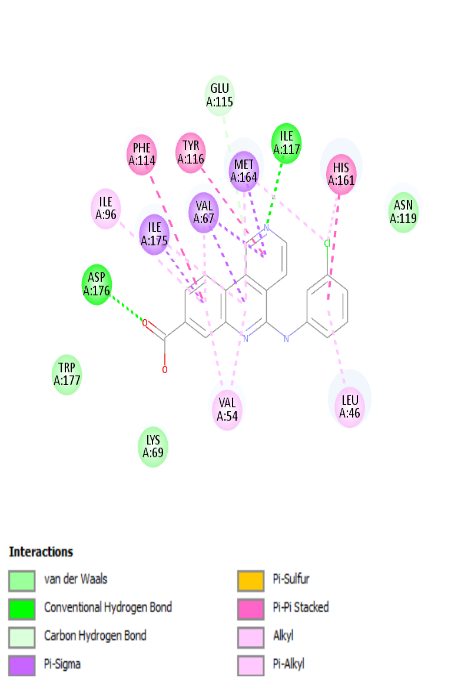 | 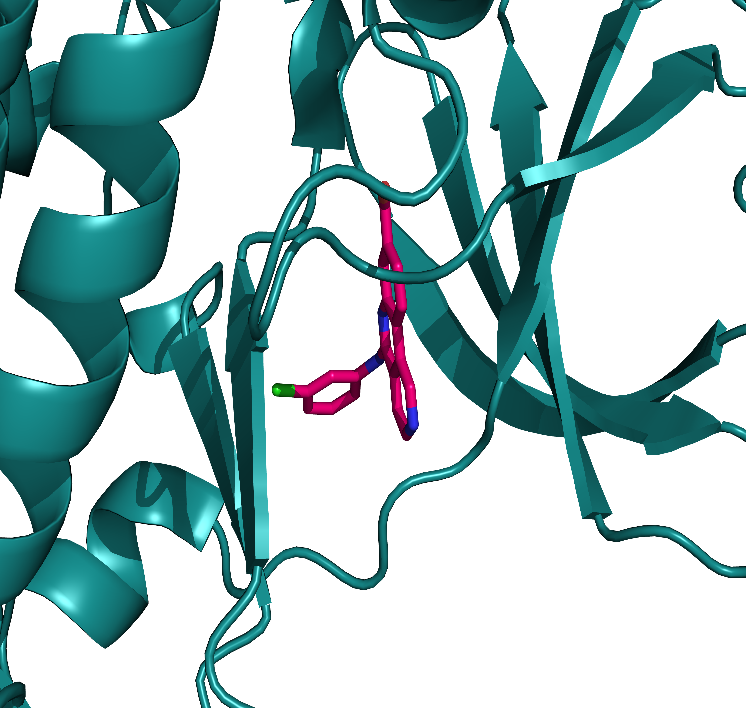 |
| MYC | Nadroparin | -8.0 | 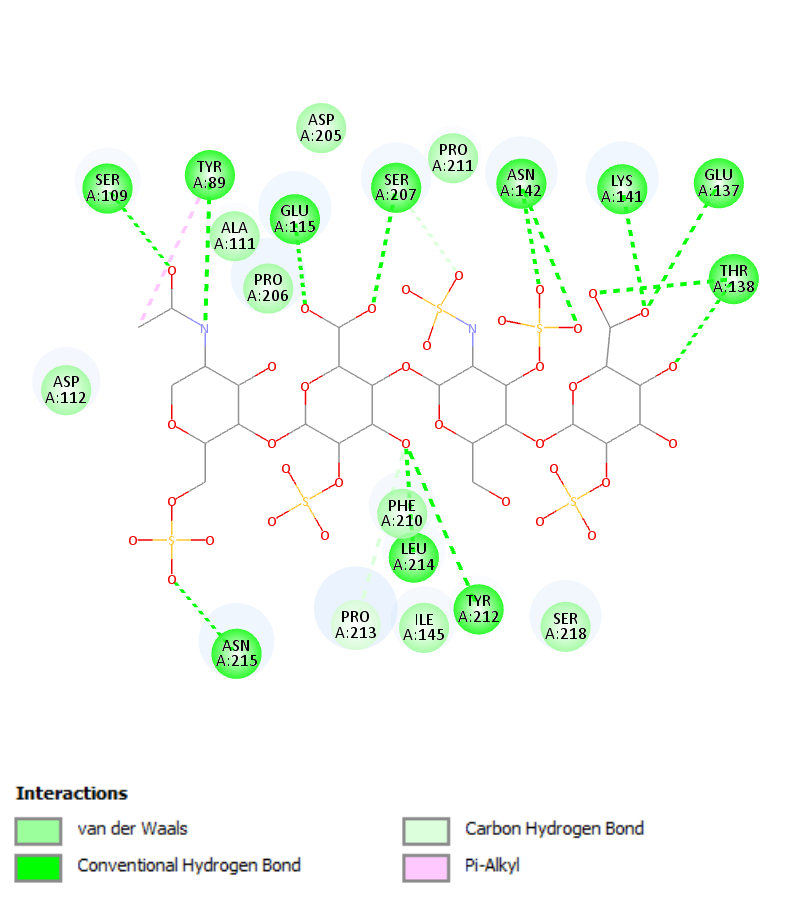 | 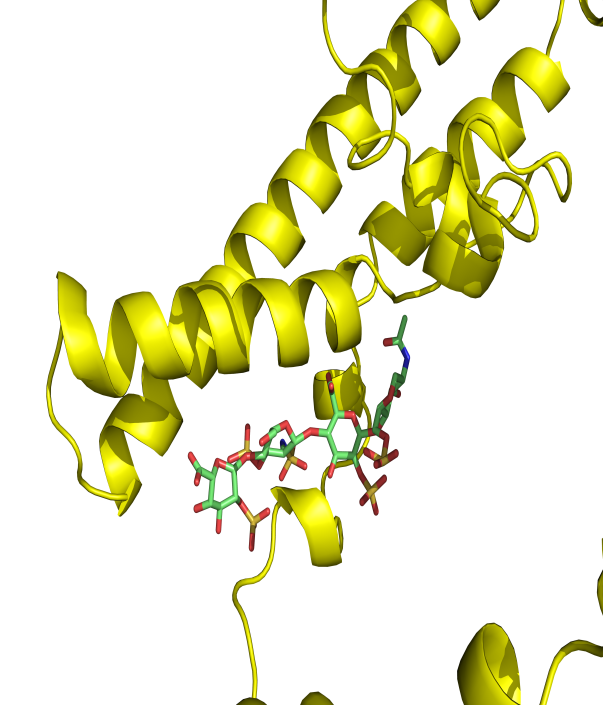 |
| MYC | Doconexent | -4.9 | 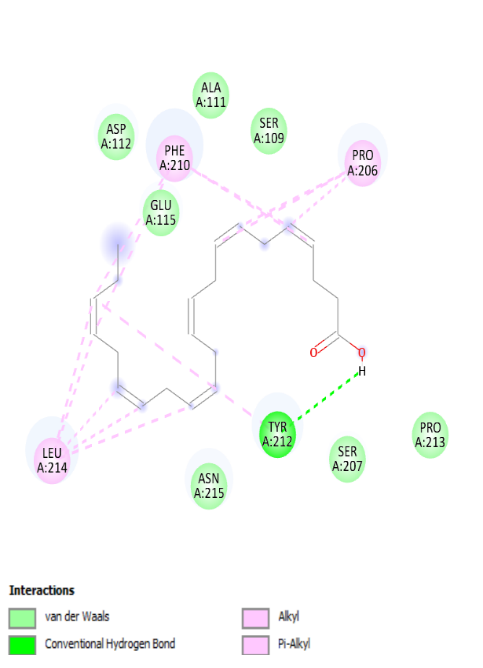 | 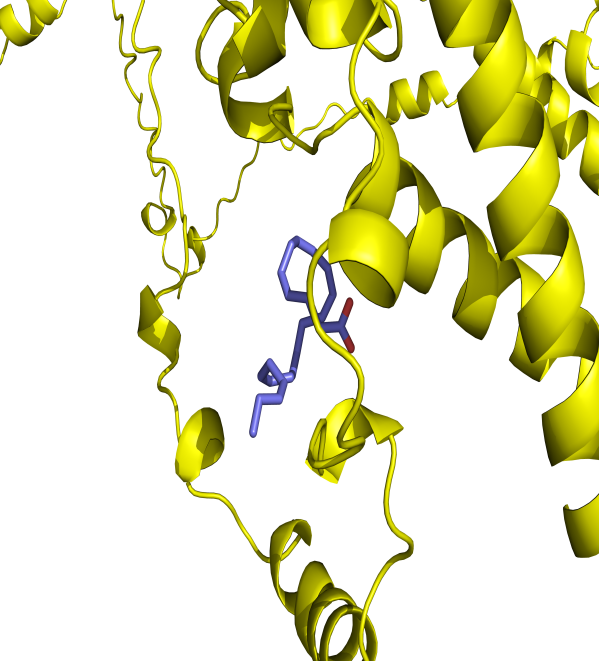 |
| MYC | Acetylsalicylic acid | -5.9 | 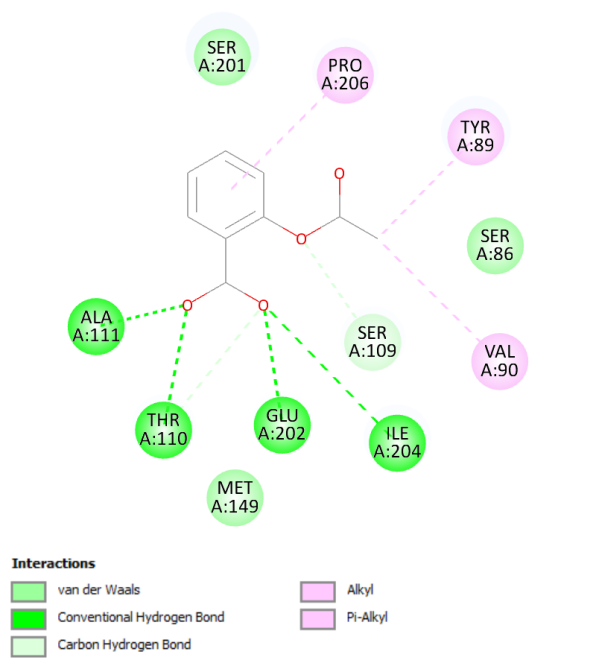 | 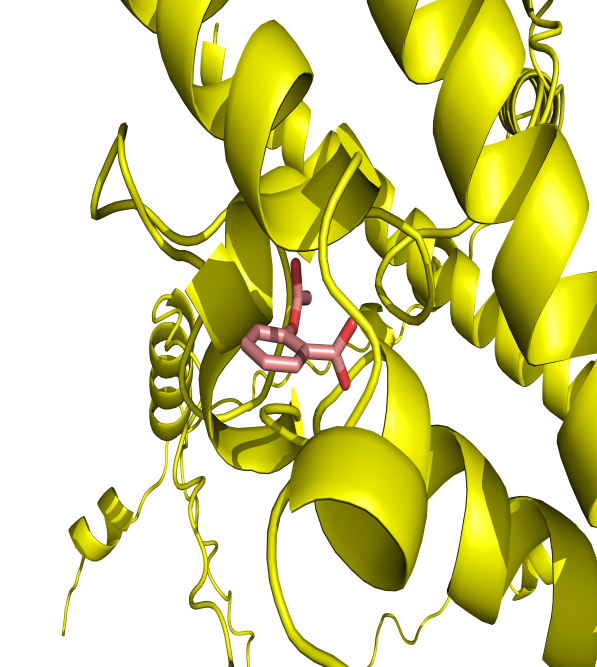 |
| MYC | MYCi975 | -9.0 | 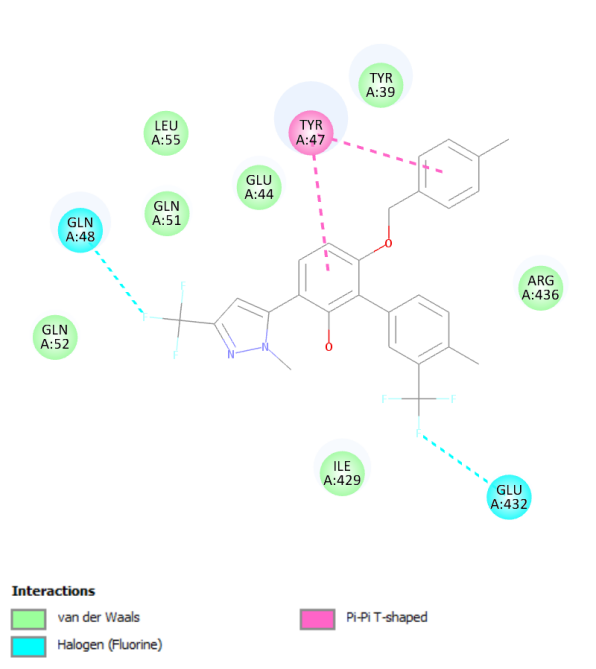 | 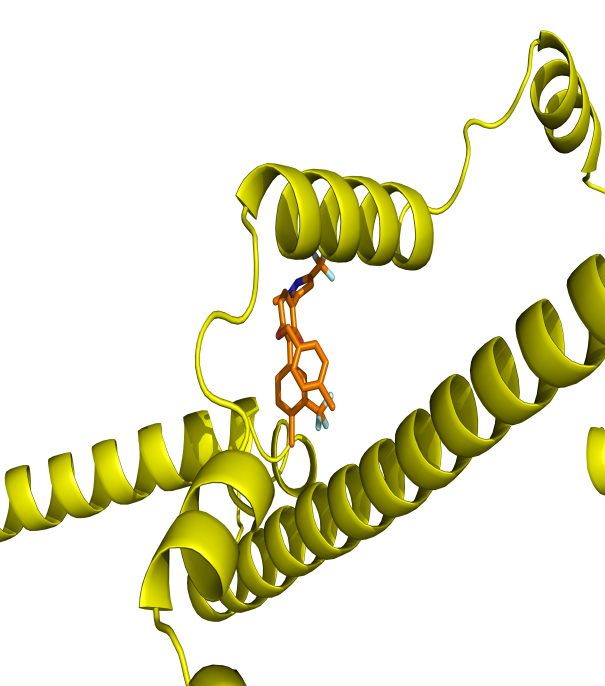 |
| MYC | PROTAC-targeted degraders | -8.7 | 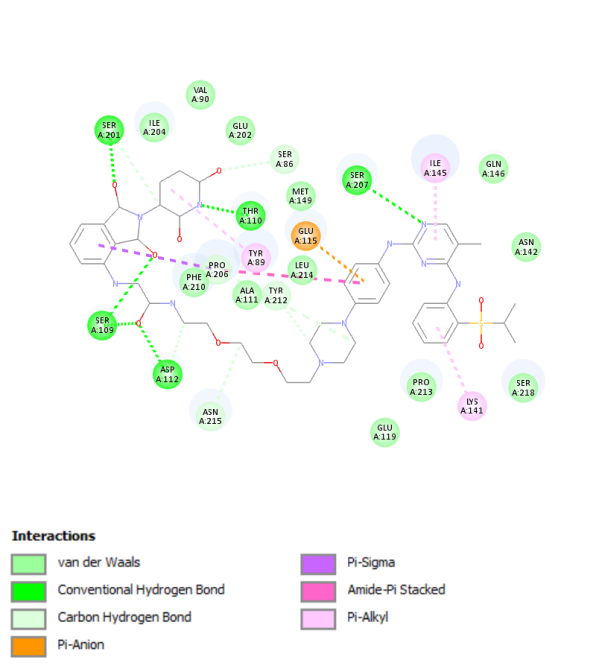 | 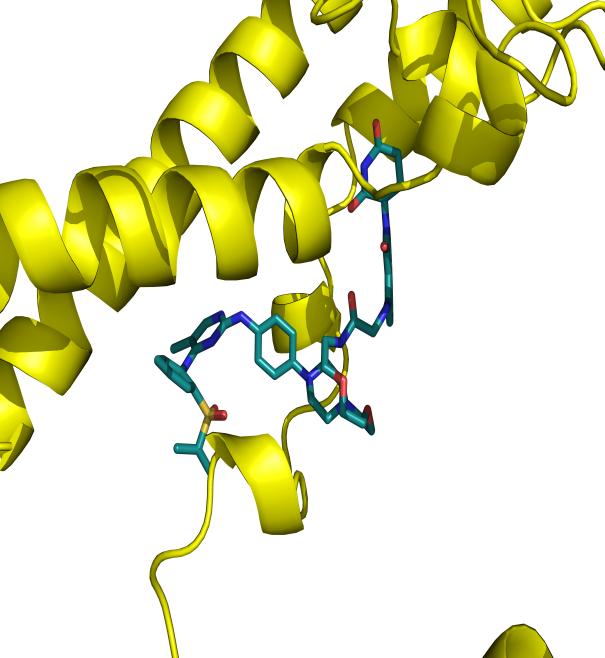 |
